# Supplementary material for: Human Amnion-Derived Mesenchymal Stromal/Stem Cells Pre-Conditioning Inhibits Inflammation and Apoptosis of Immune and Parenchymal Cells in an In Vitro Model of Liver Ischemia/Reperfusion
Source: MDPI journal article supplement (doi:10.3390/cells11040709), 2022-02-17
Supplement: s1 [file s1]

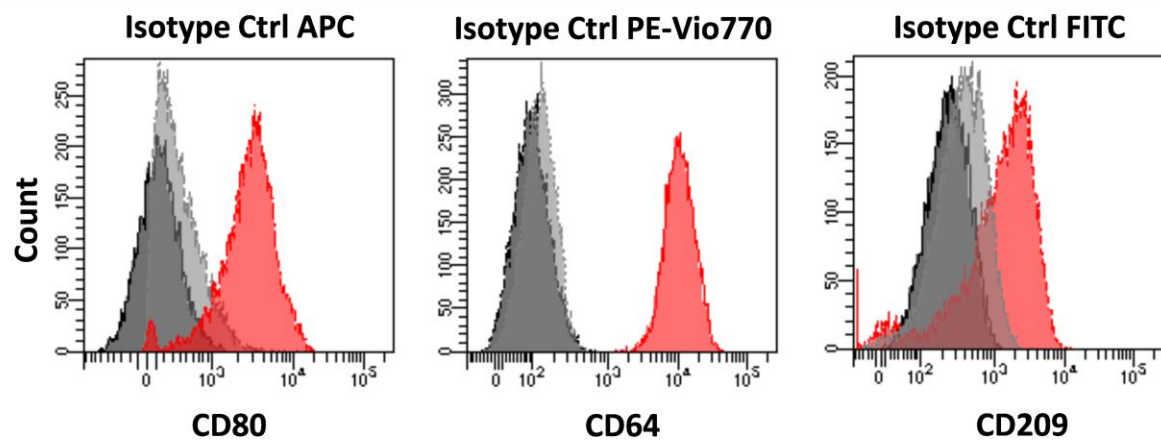

(a)

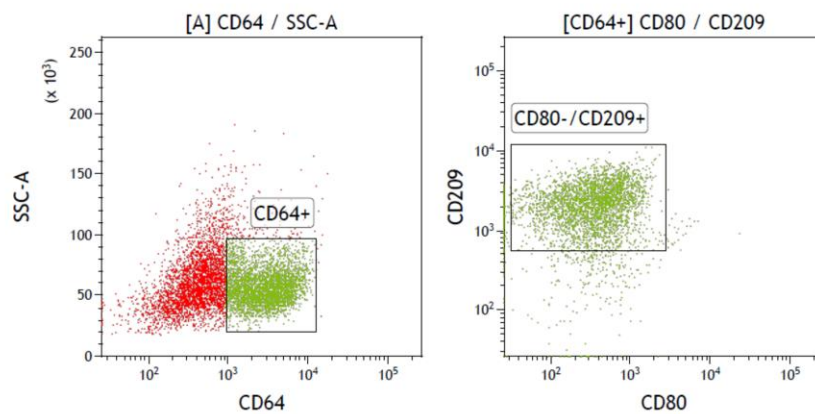

**M2  $\phi$  : CD64<sup>+</sup>/CD80<sup>-</sup>/CD209<sup>+</sup>**

(b)

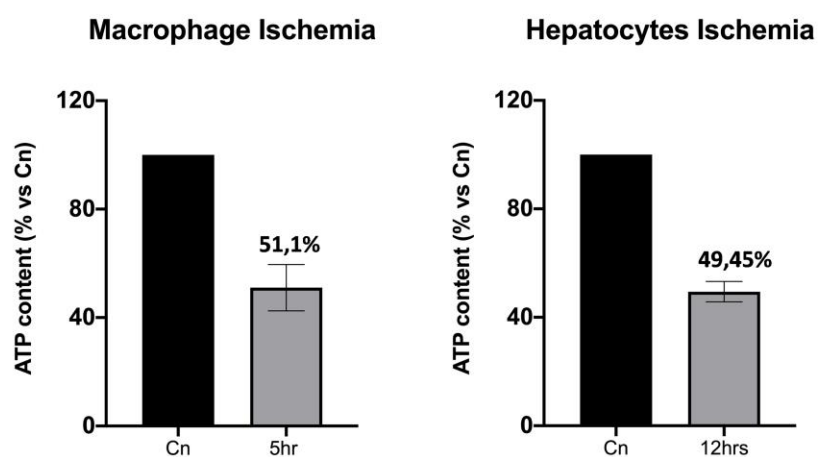

(c)

**Figure S1:** Isotype controls for Flow cytometry analysis (a); Flow cytometry plot of M2-like macrophages (b); ATP content analysis at 5hrs (macrophages) and 12hrs (hepatocytes) of cold ischemia (c).
